# Supplementary material for: Can ultrasound novices develop image acquisition skills after reviewing online ultrasound modules?
Source: BMC Med Educ. 2021 Mar 20;21:175. doi: 10.1186/s12909-021-02612-z (PMC7980807; doi:10.1186/s12909-021-02612-z)
Supplement: Supplementary file 3 — Additional file 3. Data collected from study with descriptive statistical analysis. [file 12909_2021_2612_MOESM3_ESM.xlsx]

## Sheet: SonoSim Modules&Hands-On
		SonoSim Online Module Performance (%)					Hands-on Session Performance and Difficulty Ratings
Student NUMBER	Gender	Total Score (out of 100%)	Aorta/IVC (%)	Cardiac (%)	Renal (%)	Soft Tissue/ Superficial (%)	Total Score Hands-on (43pts total)	Total Score Hands-on (%)	Aorta Score (9pts total)	Aorta Score (%)	Aorta difficulty (Easiest 1-5 Most difficult)	IVC Score (3 pts total)	IVC Score (%)	IVC Difficulty (1-5)	Aorta/IVC Score (12pts total)	Aorta/IVC Score (%)	Cardiac Score (11pts total)	Cardiac Score (%)	Cardiac Difficulty (1-5)	Renal Score (13pts total)	Renal Score (%)	Renal Difficulty (1-5)	Superficial Score (7pts total)	Superficial Score (%)	Superficial Difficulty (1-5)
1	M	86.25	85	90	85	85	39	0.906977	7	0.777778	2	3	1	1	10	0.833333	10	0.909091	3	13	1	1	7	1	3
2	F	91.25	95	90	80	100	36	0.837209	7	0.777778	2	1	0.333333	2	10	0.833333	8	0.727273	2	12	0.923077	1	6	0.857143	1
3	M	83.75	85	85	85	80	23	0.534884	6	0.666667	3	3	1	2	9	0.75	3	0.272727	4	7	0.538462	3	4	0.571429	2
4	F	85	85	80	90	85	30	0.697674	5	0.555556	3	1	0.333333	3	9	0.75	10	0.909091	2	7	0.538462	4	7	1	1
5	M	82.5	80	85	85	80	33	0.767442	6	0.666667	3	3	1	2	9	0.75	7	0.636364	4	11	0.846154	2	6	0.857143	2
6	F	78.75	80	75	80	80	30	0.697674	4	0.444444	4	3	1	2	7	0.583333	8	0.727273	3	8	0.615385	3	7	1	2
7	M	92.5	100	100	90	80	40	0.930233	9	1	1	3	1	1	12	1	9	0.818182	2	12	0.923077	1	7	1	1
8	F	85	85	90	75	90	36	0.837209	7	0.777778	2	3	1	2	12	1	7	0.636364	3	13	1	2	6	0.857143	2
9	M	95	95	95	90	100	42	0.976744	8	0.888889	1	3	1	1	11	0.916667	11	1	5	13	1	3	7	1	1
10	F	95	100	100	85	95	38	0.883721	7	0.777778	3	3	1	3	10	0.833333	10	0.909091	2	12	0.923077	4	6	0.857143	2
11	M	95	100	100	80	100	37	0.860465	7	0.777778	4	2	0.666667	3	9	0.75	9	0.818182	1	13	1	1	6	0.857143	3
12	M	90	95	85	85	95	38	0.883721	9	1	2	3	1	2	12	1	8	0.727273	4	11	0.846154	4	7	1	1
13	M	81.25	80	80	75	90	36	0.837209	8	0.888889	3	3	1	2	11	0.916667	10	0.909091	3	8	0.615385	4	7	1	1
14	M	90	90	90	90	90	38	0.883721	8	0.888889	4	3	1	3	11	0.916667	11	1	1	9	0.692308	4	7	1	1
15	M	90	90	90	85	95	38	0.883721	9	1	3	2	0.666667	3	11	0.916667	10	0.909091	2	10	0.769231	3	7	1	1
16	F	91.25	95	85	85	100	39	0.906977	8	0.888889	2	3	1	3	11	0.916667	10	0.909091	3	11	0.846154	4	7	1	1
17	F	95	95	90	95	100	41	0.953488	9	1	1	2	0.666667	2	11	0.916667	10	0.909091	3	13	1	3	7	1	1
18	F	90	95	85	95	85	30	0.697674	6	0.666667	5	1	0.333333	4	7	0.583333	8	0.727273	4	9	0.692308	4	6	0.857143	2
19	M	92.5	95	90	90	95	36	0.837209	8	0.888889	4	2	0.666667	4	10	0.833333	7	0.636364	4	12	0.923077	2	7	1	1
20	M	92.5	90	95	90	95	42	0.976744	9	1	2	3	1	1	12	1	11	1	2	13	1	2	6	0.857143	2
21	F	87.5	95	75	80	100	37	0.860465	8	0.888889	1	3	1	2	11	0.916667	7	0.636364	3	13	1	2	6	0.857143	1
22	F	82.5	80	75	85	90	38	0.883721	8	0.888889	2	2	0.666667	4	10	0.833333	10	0.909091	3	12	0.923077	2	6	0.857143	3
23	F	75	75	75	75	75	22	0.511628	4	0.444444	2	2	0.666667	3	6	0.5	2	0.181818	4	8	0.615385	2	6	0.857143	2
24	M	85	85	90	85	80	36	0.837209	8	0.888889	2	2	0.666667	3	10	0.833333	10	0.909091	3	11	0.846154	3	5	0.714286	3
25	M	86.25	85	95	75	90	38	0.883721	7	0.777778	3	3	1	2	10	0.833333	10	0.909091	4	11	0.846154	4	7	1	2
26	F	83.75	90	85	75	85	33	0.767442	8	0.888889	3	2	0.666667	3	10	0.833333	7	0.636364	3	9	0.692308	3	7	1	2
27	F	87.5	90	80	90	90	37	0.860465	6	0.666667	3	3	1	4	9	0.75	10	0.909091	2	12	0.923077	4	6	0.857143	3
28	F	91.25	100	85	90	90	36	0.837209	9	1	2	3	1	2	12	1	8	0.727273	3	10	0.769231	4	6	0.857143	2
29	F	90	90	85	95	90	33	0.767442	7	0.777778	2	3	1	2	10	0.833333	6	0.545455	4	10	0.769231	4	7	1	1
30	M	83.75	75	85	85	90	35	0.813953	9	1	2	3	1	2	12	1	7	0.636364	3	11	0.846154	4	5	0.714286	3
31	M	86.25	90	90	75	90	33	0.767442	9	1	3	3	1	4	12	1	5	0.454545	5	10	0.769231	3	6	0.857143	1
32	M	82.5	85	80	75	90	32	0.744186	8	0.888889	1	3	1	2	11	0.916667	6	0.545455	4	9	0.692308	3	6	0.857143	1
33	M	82.5	80	80	85	85	34	0.790698	7	0.777778	2	3	1	2	10	0.833333	7	0.636364	4	11	0.846154	4	6	0.857143	2
34	F	incomplete	incomplete (reviewed 100%)	incomplete (reviewed 100%)	75	incomplete (reviewed 37%)	27	0.627907	7	0.777778	2	3	1	2	10	0.833333	5	0.454545	4	7	0.538462	3	5	0.714286	3
35	F	incomplete	incomplete (reviewed 75%)	incomplete (reviewed 0%)	incomplete (reviewed 0%)	incomplete (reviewed 0%)	20	0.465116	4	0.444444	3	3	1	2	7	0.583333	4	0.363636	5	6	0.461538	4	3	0.428571	4
36	M	incomplete	85	incomplete (reviewed 100%)	85	90	37	0.860465	7	0.777778	2	2	0.666667	3	11	0.916667	11	1	2	10	0.769231	2	7	1	3
37	F	incomplete	incomplete (reviewed 100%)	incomplete (reviewed 83%)	incomplete (reviewed 100%)	80	37	0.860465	6	0.666667	2	3	1	1	9	0.75	9	0.818182	2	13	1	3	6	0.857143	3
38	M	incomplete	85	75	incomplete (reviewed 100%)	85	36	0.837209	6	0.666667	3	2	0.666667	3	8	0.666667	11	1	5	11	0.846154	2	7	1	2
39	F	incomplete	incomplete (reviewed 100%)	incomplete (31% reviewed)	incomplete (33% reviewed)	incomplete (20% reviewed)	25	0.581395	4	0.444444	4	1	0.333333	4	5	0.416667	5	0.454545	3	9	0.692308	3	6	0.857143	2
40	F	incomplete	90	incomplete (100% reviewed)	85	incomplete (0% reviewed)	40	0.930233	9	1	2	3	1	2	12	1	8	0.727273	2	13	1	3	7	1	1
41	F	incomplete	75	incomplete (reviewed 100%)	incomplete (reviewed 100%)	75	33	0.767442	5	0.555556	3	1	0.333333	4	6	0.5	8	0.727273	4	13	1	3	6	0.857143	1
42	F	incomplete	incomplete (reviewed 100%)	incomplete (reviewed 100%)	incomplete (reviewed 100%)	incomplete (reviewed 100%)	37	0.860465	9	1	1	3	1	1	12	1	7	0.636364	2	11	0.846154	2	7	1	1
43	F	incomplete	75	incomplete (100% reviewed)	85	80	34	0.790698	8	0.888889	3	2	0.666667	3	10	0.833333	7	0.636364	4	10	0.769231	3	7	1	1
44	M	incomplete	80	incomplete (100% reviewed)	incomplete (83% reviewed)	incomplete (reviewed 100%)	27	0.627907	5	0.555556	3	3	1	3	8	0.666667	7	0.636364	5	7	0.538462	5	5	0.714286	4
Average module scores only for those who completed all modules (yellow excluded)		87.4621	88.9394	86.6667	84.3939	89.8485
Standard deviation		5.03392	7.26266	7.14435	6.34399	7.01392
Average scores for hands-on sessions only (includes everyone)							34.5227	0.802854	7.15909	0.795455	2.5	2.52273	0.840909	2.47727	9.88636	0.823864	8.04545	0.731405	3.18182	10.5455	0.811189	2.95455	6.25	0.892857	1.86364
Standard deviation							5.20058	0.120944	1.55434	0.172704	0.952353	0.698458	0.232819	0.927328	1.81999	0.151666	2.23039	0.202763	1.08419	2.03977	0.156906	1.01052	0.892475	0.127496	0.904534
Average scores for hands-on of those who completed all online modules (excluding highlighted rows)							35.3333	0.821705	7.42424	0.824916	2.48485	2.57576	0.858586	2.45455	10.2121	0.85101	8.24242	0.749311	3.09091	10.7273	0.825175	2.93939	6.33333	0.904762	1.72727
Standard deviation							4.58712	0.106677	1.39262	0.154736	1.00378	0.662868	0.220956	0.904534	1.5157	0.126308	2.20837	0.200761	1.0113	1.85864	0.142972	1.05887	0.73598	0.10514	0.761279
			Aorta/IVC, n=39	Cardiac, n=34	Renal, n=37	Superficial, n=38
Averages of those who completed each module completely			87.8205	86.3235	84.1892	88.8158								Of those who completed the online modules	Aorta/IVC, n=39	0.837607
STDEV			7.50394	7.31425	6.18168	7.29996										0.137794
															Cardiac, n=34			0.756684
																		0.202316
															Renal, n=37						0.819127
																					0.146419
															Superficial, n=38									0.909774
																								0.101945
Average scores for hands-on of those who did not complete the modules								0.7463		0.707071			0.787879			0.716667		0.645455			0.769231			0.785714
STDEV								0.147617		0.200448			0.26968			0.225154		0.189			0.21299			0.216654
																n=5		n=10			n=7			n=6
Completed All Modules and Hands-On Session
Males: 18	0.545455
Females: 15	0.455
Everyone
Males: 21	0.477
Females: 23	0.523
Median hands-on skills evaluation score		83.75
Median completed modules score		87.5
		Manuscript:
		Background: POCUS used in integrating medical education												To review the scores of the online modules:
		hard to find teachers/experts to teach everyone												1. Go to https://instructor.sonosim.com.
		here is an outline training module, would it be enough to increase knowledge base and skills												2. Username: esitu and password is astec123
		SonoSim claims this, and we wanted to test it												3. Click "Table View" under Student Performance Tracker.
														4. Enter the scores in the appropriate columns.
		methods:												5. If a student did not complete a module, just write "Incomplete"
		describe study setting: med school
		study population: medical students, minimal familiarity with US
		study protocol: training modules, then reviewed, and gave 1 month for review and showed up
		testing
		instructors
		3 standardized patient
		filled out anonymous survey
		25 students
		gender
		MUST LOOK AT HOW MUCH WAS REVIEWED
		DESCRIPTIVE STATS
		AORTA VS SOFT VS CARDIAC VS RENAL - WHICH WAS BETTER/LEVEL OF DIFFICULTY
		COMPARE APPLICATION TO APPLICATION
		IS THERE A STATISCALLY SIGNFICANT LEVEL OF DIFFICULTY DIFFERENCE BETWEEN APPLICATIONS
		CORRELATE PERFOMANCE TO HANDS-ON

## Sheet: Surveys
Survey #	"SonoSim education modules are a good start to learning sonographic anatomy." (1-Strongly Agree, 2-Somewhat agree, 3-Neither agree nor disagree, 4-Somewhat disagree, 5-Strongly disagree)	"SonoSim education modules are adequate to learning ultrasound scanning technique." (1-Strongly Agree, 2-Somewhat agree, 3-Neither agree nor disagree, 4-Somewhat disagree, 5-Strongly disagree)	Rate level of confidence in acquiring ultrasound images (1-Low to 10-High)
1	1	1	8			Question 2:	1	19
2	1	2	7				2	18
3	1	2	7				3	3
4	2	2	6				4	4
5	1	1	6				5	0
6	1	2	5
7	1	1	7			Question 3:	1	0
8	2	1	5				2	0
9	1	2	5				3	1
10	1	2	7				4	2
11	1	2	5				5	10
12	1	1	7				6	8
13	2	4	5				7	14
14	1	1	9				8	6
15	1	2	7				9	3
16	1	3	6				10	0
17	1	3	7
18	1	2	8
19	1	2	5
20	1	1	7
21	1	1	8
22	1	1	8
23	1	2	7
24	1	1	8
25	1	1	9
26	1	4	5
27	2	4	4
28	1	2	3
29	2	2	6
30	1	2	5
31	2	3	7
32	1	2	7
33	1	1	9
34	1	2	7
35	1	1	6
36	1	2	5
37	1	1	8
38	1	1	7
39	1	1	7
40	1	1	6
41	2	2	6
42	1	1	4
43	1	1	6
44	1	4	5
